# Refining the prognostic impact of functional mitral regurgitation in chronic heart failure

Georg Golasch<sup>1\*</sup>, Philipp E. Bartko<sup>1</sup>, Noemi Pavo<sup>1</sup>, Stephanie Neuhold<sup>2</sup>, Raphael Wurm<sup>1</sup>, Julia Mascherbauer<sup>1</sup>, Irene M. Lang<sup>1</sup>, Guido Strunk<sup>3</sup>, and Martin Hülsmann<sup>1</sup>

<sup>1</sup>Department of Internal Medicine II, Medical University of Vienna, Waehringer Guertel 18-20, A-1090 Vienna, Austria; <sup>2</sup>Department of Medicine IV, Kaiser Franz Josef Spital, Kundratstraße 3, 1100 Wien, Vienna, Austria; and <sup>3</sup>FH Campus Wien and Complexity Research, Favoritenstrasse 226, 1100 Wien, Vienna, Austria

Received 7 February 2017; revised 6 May 2017; editorial decision 27 June 2017; accepted 27 June 2017; online publish-ahead-of-print 25 July 2017

## Aims

Significant efforts are currently undertaken to reduce functional mitral regurgitation (FMR) in patients with chronic heart failure in the hope to improve prognosis. We aimed to assess the prognostic impact of FMR in heart failure with reduced ejection fraction (HFrEF) under optimal medical therapy (OMT) and various conditions of HFrEF. We further intended to identify a heart failure phenotype, where FMR is most likely a driving force and not a mere bystander of the disease.

## Methods and results

We prospectively included 576 consecutive HFrEF patients into our long-term observational study. Functional [i.e. New York Heart Association (NYHA) class], echocardiographic, invasive haemodynamic, and biochemical (i.e. NT-proBNP, MR-proANP, MR-proADM, CT-proET-1, copeptin) measurements were performed at baseline. During a median follow-up of 62 months (interquartile range 52–76), 47% of patients died. Severe FMR was a significant predictor of mortality [hazard ratio (HR) 1.76, 95% confidence interval (CI) 1.34–2.30;  $P < 0.001$ ], independent of clinical (adjusted HR 1.61, 95% CI 1.22–2.12;  $P = 0.001$ ), and echocardiographic (adjusted HR 1.46, 95% CI 1.09–1.94;  $P = 0.01$ ) confounders, OMT (adjusted HR 1.81, 95% CI 1.25–2.63;  $P = 0.002$ ), and neurohumoral activation (adjusted HR 1.38, 95% CI 1.03–1.84;  $P = 0.03$ ). Subanalysis revealed that severe FMR was associated with poor outcome in an intermediate-failure phenotype of HFrEF i.e. patients with NYHA class II (adjusted HR 2.17, 95% CI 1.07–4.44;  $P = 0.03$ ) and III (adjusted HR 1.80, 95% CI 1.17–2.77;  $P = 0.008$ ), moderately reduced left ventricular function (adjusted HR 2.37, 95% CI 1.36–4.12;  $P = 0.002$ ), and within the second quartile (871–2360 pg/mL) of NT-proBNP (adjusted HR 2.16, 95% CI 1.22–3.86;  $P = 0.009$ ).

## Conclusion

In a patient cohort under OMT, the adverse prognostic impact of FMR is given predominantly in a sub-cohort of a specific intermediate-failure phenotype—well-defined functionally, haemodynamically, biochemically, and morphologically.

## Keywords

Functional mitral regurgitation • HFrEF • Prognosis

## Introduction

Chronic heart failure (HF) is frequently accompanied by functional mitral regurgitation (FMR)<sup>1</sup> caused by left ventricular (LV) remodelling and subsequent papillary muscle displacement resulting in mitral valve (MV) leaflet tethering, dilatation, and flattening of the mitral annulus and reduced closing forces.<sup>2,3</sup> The pathophysiologic effects of FMR are not well understood, presumably volume overload on a failing ventricle

increases diastolic wall stress<sup>4</sup> and consequently stimulates further maladaptation including up-regulation of pro-hypertrophic and anti-apoptotic signalling<sup>5</sup> and neurohumoral activation leading to further ventricular dilatation and failure.<sup>1,6</sup> Functional mitral regurgitation is associated with HF symptoms, increased hospitalization rates and worse long-term prognosis of patients with chronic HF.<sup>1,7,8</sup> However, it remains debated whether FMR is a central driving force of HF progression or rather a bystander, reflecting the severity of the disease.

\* Corresponding author. Tel: +43 1 40400 46140, Fax: +43 1 40400 42160, Email: [georg.golasch@meduniwien.ac.at](mailto:georg.golasch@meduniwien.ac.at)

Published on behalf of the European Society of Cardiology. All rights reserved. © The Author 2017. For permissions, please email: [journals.permissions@oup.com](mailto:journals.permissions@oup.com).

Nevertheless, driven by recent advances in percutaneous MV repair (PMVR), significant efforts are currently undertaken to reduce FMR in patients with HF in the hope to improve prognosis.<sup>8</sup> Similar to HF patients without FMR, it is recommended to prescribe optimized guideline-directed HF therapy (OMT) targeting LV dysfunction including cardiac resynchronization therapy.<sup>2–4</sup> However, whether OMT is able to counterbalance maladaptive processes and the adverse effects of FMR on long-term survival remain unknown.<sup>9</sup> Likewise, the impact of MV repair on outcome in HF patients with severe FMR by interruption of the presumed maladaptive effects is unknown<sup>3</sup> and several randomized clinical trials (MITRA-FR, RESHAPE-HF, COAPT) are underway to test this hypothesis. These studies are designed to cover a broad spectrum of patients with advanced HF, though it is hardly conceivable that all patients will equally benefit from MV repair. In order to successfully tackle outcome, a more profound understanding of the association between FMR and long-term mortality in patients with various stages of HF seems necessary in order to identify those that will benefit most from MV repair. We therefore aimed to assess the independent prognostic impact of FMR on long-term mortality in patients with chronic HF under optimized OMT encompassing functional, haemodynamic, biochemical and echocardiographic markers. We further intended to identify a HF phenotype, where FMR is most likely a driving force of the disease.

## Methods

### Study population

We enrolled consecutive adult patients with HF with reduced ejection fraction (HFrEF) who presented to our HF clinic at the Vienna General Hospital, a university-affiliated tertiary centre in this observational, non-interventional study as previously described.<sup>10</sup> Heart failure with reduced ejection fraction was defined in line with the guidelines as history of HF signs and symptoms as well as a LV ejection fraction (LVEF) below 40%.<sup>3</sup> As the investigated population already received OMT at index time, there is a portion of patients in New York Heart Association (NYHA) stage I and improved ejection fraction > 40%. All patients who underwent a comprehensive echocardiographic exam at our institution were included, patients with more than mild aortic or mitral stenosis or ≥ moderate primary mitral regurgitation were excluded. The study was approved by the Ethics Committee of the Medical University of Vienna.

### Clinical definitions and follow-up

Baseline examination included medical history, detailed assessment of current medication, electrocardiogram recording, and a transthoracic echocardiogram. Cardiovascular risk factors were recorded according to the respective guidelines.<sup>11</sup> According to the standard operating procedure of our HF outpatient clinic and in agreement with the ESC guidelines,<sup>3</sup> dosage of medical therapy was pro-actively increased in all enrolled patients until the maximal recommended dosage was reached or a further increase was no longer possible due to the clinical characteristics of the patient (systolic blood pressure < 90 mmHg, heart rate < 60 bpm, potassium level > 5.0 mmol/L). Intensified guideline-directed therapy was defined if ≥ 50% of the recommended dosages of renin-angiotensin system (RAS) antagonists with a concomitant dosage of ≥ 50% of the recommended dosages of beta blockers were reached and mineralocorticoid antagonist therapy was prescribed if indicated according to the guidelines.<sup>3</sup> Response to cardiac resynchronization therapy was defined

as improvement of EF by more than 15% or reduction in LV end-diastolic diameter by more than 15%.<sup>12</sup> Estimated glomerular filtration rate was calculated by using the Cockcroft–Gault formula. All-cause mortality was selected as primary endpoint. Mortality was determined via retrieval query of the Austrian Death Registry. Austrian law stipulates that all deaths of Austrian citizens (also in foreign countries, if reported to Austrian officials) have to be recorded in the central Austrian death registry, allowing almost complete follow up of all patients.<sup>13</sup>

### Echocardiographic and haemodynamic assessments

Standard echocardiograms were performed using commercially available equipment (Vivid5 and Vivid7, GE-Healthcare, and Acuson Sequoia, Siemens). Cardiac morphology was assessed using diameters in standard four- and two-chamber views. Severe LV dilatation was defined as left ventricular end-diastolic diameter (LVEDD) ≥ 62 mm for women and ≥ 69 mm for men.<sup>14</sup> Left ventricular ejection fraction was calculated using the biplane Simpson method and semi-quantitative assessment of right heart function were performed by experienced readers using multiple acoustic windows and graded as normal, mild, mild-to-moderate, moderate, moderate-to-severe, and severe. Mitral regurgitation was graded by an integrated approach comprising MV morphology, width of the proximal regurgitant jet, proximal flow convergence, and pulmonary venous flow pattern. Valvular stenosis and regurgitation were quantified using an integratively and graded as none, mild, mild-to-moderate, moderate, moderate-to-severe, and severe according to the guidelines.<sup>15,16</sup> Systolic pulmonary artery pressures were calculated by adding the peak tricuspid regurgitation (TR) systolic gradient to the estimated central venous pressure. Invasive haemodynamic assessment was recorded in all patients, who underwent clinically indicated right-heart catheterization at time of study enrolment. Haemodynamics were performed using a 7F-Swan-Ganz catheter (Edwards Lifesciences, Austria) via jugular or femoral access. Pressures were documented as average of eight measurements over eight consecutive heart cycles using CathCorLX (Siemens AG, Berlin, Germany).

### Laboratory measurements

Routine laboratory parameters were analysed from venous blood samples according to the local laboratory's standard procedure at study enrolment. Neurohormones were used to illustrate the haemodynamic and volume state of the cardiovascular system as both are directly related to FMR. All of them are already proven to be excellent markers of outcome in stable chronic systolic HF.<sup>10,17</sup> NT-proBNP and MR-proANP have been already tested in primary MR.<sup>18</sup> Markers for myocardial stretch were chosen specifically with respect to possible complementary information they might provide in FMR.<sup>19</sup> Functional mitral regurgitation directs an unloading of the ventricle (the main trigger for NT-proBNP) at the expense of the left atrium (the main trigger for MR-proANP) and therefore, from a mechanistically perspective, the combination of both might better reflect the haemodynamic alteration of the regurgitant lesion. MR-proADM was chosen due to its properties as a peripheral vasodilator regulating afterload<sup>20</sup> and Copeptin as well as CT-proET-1 as the direct counter-regulatory hormones. CT-pro-ET1 was used because of its endothelial release in response to shear stress and its association with MR severity.<sup>21</sup> Copeptin was used due to its independent and incremental prognostic value to NT-proBNP.<sup>10</sup> NT-proBNP measurements were performed in heparin plasma using the Elecsys Systems (Roche Diagnostics, Mannheim, Germany). MR-proANP, MR-proADM, CT-proET-1, and Copeptin were measured in EDTA plasma using specific sandwich immunoassays (BRAHMS, Hennigsdorf/Berlin, Germany).

## Statistical methods

Continuous data were presented as median and interquartile range (IQR) and discrete data were presented as count and percentage. Cox proportional hazard regression analysis was applied to assess the effect of severe FMR (dichotomous: severe vs. non-severe FMR) on survival. First we conducted an unadjusted model with FMR as a single exploratory variable and in order to account for potential confounding effects, we adjusted for a clinical confounder cluster (encompassing: age, sex, ischaemic aetiology of HF, serum creatinine, and NT-proBNP), an echocardiographic confounder cluster (encompassing: LV end-diastolic diameter, LV function, severe TR), an optimal medical therapies cluster (encompassing: intensified guideline-directed therapy, implanted cardioverter defibrillator, and response to cardiac resynchronization therapy), and a neurohumoral activation cluster (encompassing: NT-proBNP, MR-proANP, MR-proADM, CT-proET-1, and Copeptin). The discriminatory power of the respective clusters was assessed using Harrell's C-statistic. In order to test for interactions between severe FMR and all above named variables, we used Cox proportional hazard regression models with FMR, a variable in question and the interaction between both variables. We tested for collinearity in the multivariable model using the variance inflation factor. The proportional hazards assumption was tested and satisfied in all cases using Schoenfeld residuals. Cox survival curves adjusted for all variables in the clinical confounder cluster were presented according to FMR severity (no/mild, moderate, severe). Sub-group analysis was performed to assess the impact of severe FMR on outcome in various stages of HF categorized by functional status (NYHA class), echocardiographic parameters [LV function, LV, and left atrium (LA) size] and biochemical markers (NT-proBNP, MR-proANP, MR-proADM, CT-proET-1, and Copeptin). Two-sided  $P$ -values  $< 0.05$  were used to indicate statistical significance. The STATA11 software package (StataCorp, College Station, TX, USA) and SPSS 24.0 (IBM Corp, New York, NY, USA) were used for all analyses.

## Results

### Baseline characteristics

We enrolled a total of 576 patients with HF. Median age was 58 (IQR 50–64), 83% ( $n = 476$ ) were male. The median NT-proBNP was 2360 pg/mL (IQR 867–5163) and LV function was significantly reduced ( $\geq$ moderate) in 84% ( $n = 484$ ) of patients. Forty-one percent of patients ( $n = 236$ ) were in NYHA functional class III and 21% ( $n = 121$ ) in NYHA class IV. Regarding HF therapy, 551 patients (96%) received RAS antagonists up-titrated to a median dose of 100% of the maximal guideline recommended dosages, 410 patients (71%) received beta-blockers up-titrated to a median dose of 50% of the maximal guideline recommended dosages, 189 patients (33%) were treated with a mineralocorticoid receptor antagonist. Fifty-five patients (10%) underwent cardiac resynchronization therapy with a response rate of 52%. Detailed baseline characteristics of the entire study population are displayed in *Table 1*.

### Severity of functional mitral regurgitation and outcome

Detailed baseline characteristics according to severity of mitral regurgitation are presented in *Table 1*. Briefly, with increasing FMR severity levels of NT-proBNP (mild/noMR: 1556 pg/mL [IQR 440–3670], moderate MR: 2672 pg/mL [IQR 1243–5649], severe MR: 4262 pg/mL [IQR 2317–7527];  $P < 0.001$ ), NYHA class ( $P < 0.001$ ), and prevalence of atrial fibrillation [mild/noMR: 48 patients (17%), moderate

MR: 37 (20%), severe MR: 34 (29%);  $P = 0.05$ ] increased, while LV function decreased ( $P < 0.001$ ). Vice-versa severity of FMR gradually increased with rising NYHA class ( $P < 0.001$ ; *Figure 1A*) as well as levels of NT-proBNP ( $P < 0.001$ ; *Figure 1B*). During a median follow-up time of 62 months (IQR 52–76 months), 47% of patients ( $n = 271$ ) died. Adjusted survival curves demonstrated a significant increase of mortality with increasing FMR severity (*Figure 2*,  $P < 0.001$ ). We observed an hazard ratio (HR) of 1.76 [95% confidence interval (CI) 1.34–2.30;  $P < 0.001$ ] comparing patients with severe FMR to patients with non-severe FMR. This result remained virtually unchanged after multivariable adjustment using a clinical confounder cluster, an echocardiographic confounder cluster, an optimal medical therapies cluster, and a neurohumoral activation cluster encompassing various neurohumoral pathways in HF (*Table 2*). Furthermore, we did not observe any significant interaction between severe FMR and ischaemic or non-ischaemic FMR ( $P$ -for-interaction = 0.57). Additionally, we did not observe any significant interactions between severe FMR and any other variables included in the multivariable model and we did not detect a significant collinearity in our multivariable models.

### Severe functional mitral regurgitation and New York Heart Association functional class

We further assessed the incremental prognostic value of severe FMR in various stages of HF. We observed a significant association between severe FMR and long-term mortality in patients with NYHA functional class II (adjusted HR 2.17, 95% CI 1.07–4.44;  $P = 0.03$ ) and class III (adjusted HR 1.80, 95% CI 1.17–2.77;  $P = 0.008$ ), whereas no statistically significant association was present in NYHA class I ( $P = 0.73$ ) and IV ( $P = 0.71$ ; *Table 3*).

### Severe functional mitral regurgitation and echocardiographic indicators in heart failure

Severe FMR was associated with outcome in patients with moderately reduced LV function (LVEF 30–40%; adjusted HR 2.37, 95% CI 1.36–4.12;  $P = 0.002$ ) but not in patients with severely reduced LV function (LVEF  $< 30\%$ ; HR 1.31, 95% CI 0.95–1.81;  $P = 0.10$ ; *Table 3*). Comparably, severe FMR was associated with poor prognosis in patients with smaller LV size ( $\leq$ moderately dilated LV: adjusted HR 2.00, 95% CI 1.39–2.87;  $P < 0.001$  vs. severely dilated LV: adjusted HR 1.41, 95% CI 0.92–2.16;  $P = 0.11$ ) and smaller LA size [LA diameter  $\leq 64$  mm (i.e. median): adjusted HR 2.45, 95% CI 1.50–4.01;  $P < 0.001$  vs. LA diameter  $> 64$  mm: adjusted HR 1.31, 95% CI 0.93–1.83;  $P = 0.12$ ] as well as in patients without severe TR ( $\leq$ moderate TR: adjusted HR 1.65, 95% CI 1.23–2.22;  $P = 0.001$  vs. severe TR: adjusted HR 2.17, 95% CI 0.70–6.73;  $P = 0.18$ ).

### Severe functional mitral regurgitation and neuro-humoral pathways in heart failure

The predictive value of FMR severity remained independent of neurohumoral activation encompassing NT-proBNP, MR-proANP, MR-proADM, CT-proET-1, and copeptin (*Table 2*).

Analogously to NYHA functional class and echocardiographic markers, severe FMR was associated with poor outcome in patients

**Table 1** Baseline characteristics of total study population (n = 576) according to severity of mitral regurgitation

|                                                    | Total study population<br>(n = 576) | No/mild MR<br>(n = 272) | Moderate MR<br>(n = 185) | Severe MR<br>(n = 119) | P-value          |
|----------------------------------------------------|-------------------------------------|-------------------------|--------------------------|------------------------|------------------|
| Baseline characteristics                           |                                     |                         |                          |                        |                  |
| Age, median years (IQR)                            | 58 (50–64)                          | 57 (49–63)              | 59 (51–66)               | 58 (50–64)             | 0.11             |
| Male sex, n (%)                                    | 476 (83)                            | 234 (86)                | 143 (77)                 | 99 (83)                | 0.053            |
| BMI, kg/m <sup>2</sup> (IQR)                       | 26 (24–29)                          | 27 (24–29)              | 26 (24–28)               | 26 (24–28)             | <b>0.02</b>      |
| Systolic blood pressure, mmHg (IQR)                | 115 (100–130)                       | 120 (104–135)           | 115 (100–120)            | 103 (91–120)           | <b>0.001</b>     |
| Ischaemic aetiology of HF, n (%)                   | 225 (39)                            | 105 (39)                | 79 (43)                  | 35 (29)                | 0.35             |
| Hypertension, n (%)                                | 284 (49)                            | 148 (54)                | 94 (51)                  | 42 (35)                | <b>0.02</b>      |
| Diabetes, n (%)                                    | 130 (23)                            | 71 (26)                 | 41 (22)                  | 18 (15)                | 0.06             |
| Hypercholesterolaemia, n (%)                       | 234 (41)                            | 123 (45)                | 76 (41)                  | 35 (29)                | <b>0.01</b>      |
| Left bundle branch block, n (%)                    | 112 (19)                            | 60 (22)                 | 33 (18)                  | 19 (16)                | 0.94             |
| Atrial fibrillation, n (%)                         | 119 (21)                            | 48 (17)                 | 37 (20)                  | 34 (29)                | <b>0.05</b>      |
| NYHA functional class                              |                                     |                         |                          |                        | <b>&lt;0.001</b> |
| NYHA I, n (%)                                      | 66 (11)                             | 40 (15)                 | 17 (9)                   | 9 (8)                  |                  |
| NYHA II, n (%)                                     | 153 (27)                            | 82 (30)                 | 55 (30)                  | 16 (13)                |                  |
| NYHA III, n (%)                                    | 236 (41)                            | 119 (44)                | 69 (37)                  | 48 (40)                |                  |
| NYHA IV, n (%)                                     | 121 (21)                            | 31 (11)                 | 44 (24)                  | 46 (39)                |                  |
| Creatinine, mg/dL (IQR)                            | 1.2 (1.0–1.4)                       | 1.2 (1.0–1.3)           | 1.2 (1.0–1.4)            | 1.3 (1.1–1.5)          | <b>0.005</b>     |
| Estimated GFR, mL/min/1.73 m <sup>2</sup> (IQR)    | 75 (58–94)                          | 79 (61–99)              | 71 (59–88)               | 68 (53–86)             | <b>&lt;0.001</b> |
| Blood urea nitrogen, mg/dL (IQR)                   | 20 (17–30)                          | 20 (15–25)              | 21 (17–30)               | 25 (20–38)             | <b>&lt;0.001</b> |
| Neurohormones                                      |                                     |                         |                          |                        |                  |
| NT-proBNP, pg/mL (IQR)                             | 2360 (867–5163)                     | 1556 (440–3670)         | 2672 (1243–5649)         | 4262 (2317–7527)       | <b>&lt;0.001</b> |
| MR-proANP, pmol/L (IQR)                            | 275 (131–479)                       | 184 (86–360)            | 293 (187–468)            | 479 (298–745)          | <b>&lt;0.001</b> |
| MR-proADM, nmol/L (IQR)                            | 0.67 (0.42–1.06)                    | 0.59 (0.38–0.92)        | 0.72 (0.45–1.03)         | 0.96 (0.55–1.66)       | <b>&lt;0.001</b> |
| Copeptin, pmol/L (IQR)                             | 11.3 (5.8–21.8)                     | 9.5 (5.1–17.7)          | 11.3 (5.9–21.4)          | 18.8 (9.1–35.3)        | <b>&lt;0.001</b> |
| CT-pro-ET1, pmol/L (IQR)                           | 62 (31–106)                         | 55 (29–90)              | 65 (31–106)              | 90 (45–157)            | <b>&lt;0.001</b> |
| Echocardiographic characteristics                  |                                     |                         |                          |                        |                  |
| Left ventricular end-diastolic diameter, mm (IQR)  | 64 (58–71)                          | 60 (54–68)              | 66 (59–71)               | 68 (62–75)             | <b>&lt;0.001</b> |
| Left ventricular function                          |                                     |                         |                          |                        | <b>&lt;0.001</b> |
| Moderately reduced (EF 30–40%), n (%)              | 159 (28)                            | 84 (31)                 | 51 (28)                  | 24 (20)                |                  |
| Severely reduced (LVEF <30%), n (%)                | 325 (56)                            | 112 (41)                | 122 (66)                 | 91 (76)                |                  |
| Left ventricular ejection fraction, % (IQR)        | 27 (20–35)                          | 32 (22–40)              | 26 (20–33)               | 25 (15–30)             | <b>0.006</b>     |
| Left atrial diameter, mm (IQR)                     | 64 (57–71)                          | 59 (53–67)              | 65 (60–71)               | 72 (64–77)             | <b>&lt;0.001</b> |
| Right ventricular end-diastolic diameter, mm (IQR) | 36 (31–42)                          | 34 (30–38)              | 36 (32–42)               | 41 (36–46)             | <b>&lt;0.001</b> |
| Tricuspid regurgitation (≥ moderate), n (%)        | 111 (19)                            | 10 (4)                  | 39 (21)                  | 62 (52)                | <b>&lt;0.001</b> |
| Medication                                         |                                     |                         |                          |                        |                  |
| RAS antagonist, n (%)                              | 551 (96)                            | 235 (86)                | 181 (98)                 | 115 (97)               | 0.09             |
| Percent of maximal recommended dose, median %      | 100%                                | 100%                    | 100%                     | 100%                   | 0.15             |
| Beta-blockers, n (%)                               | 410 (71)                            | 199 (73)                | 139 (75)                 | 72 (61)                | <b>0.01</b>      |
| Percent of maximal recommended dose, median %      | 50%                                 | 50%                     | 50%                      | 44%                    | 0.66             |
| Mineralocorticoid antagonist, n (%)                | 189 (33)                            | 78 (29)                 | 62 (34)                  | 49 (41)                | 0.052            |
| Intensified guideline-directed therapy, n (%)      | 216 (38)                            | 111 (41)                | 71 (38)                  | 34 (29)                | 0.07             |
| Furosemide, n (%)                                  | 429 (74)                            | 182 (67)                | 139 (75)                 | 108 (91)               | <b>&lt;0.001</b> |
| Amiodarone, n (%)                                  | 110 (19)                            | 37 (14)                 | 39 (21)                  | 34 (29)                | <b>0.002</b>     |
| Rhythm devices                                     |                                     |                         |                          |                        |                  |
| Implanted cardioverter defibrillator, n (%)        | 69 (12)                             | 25 (9)                  | 32 (17)                  | 12 (10)                | <b>0.03</b>      |
| Pacemaker, n (%)                                   | 100 (17)                            | 37 (14)                 | 36 (19)                  | 27 (23)                | 0.06             |
| Cardiac resynchronization therapy, n (%)           | 55 (10)                             | 27 (10)                 | 15 (8)                   | 13 (11)                | 0.46             |
| Haemodynamic characteristics                       |                                     |                         |                          |                        |                  |
|                                                    | (n = 150)                           | (n = 42)                | (n = 53)                 | (n = 55)               |                  |
| mPAP, mmHg (IQR)                                   | 38 (31–43)                          | 38 (31–43)              | 36 (31–40)               | 40 (34–43)             | 0.26             |
| PAWP, mmHg (IQR)                                   | 23 (20–26)                          | 24 (21–26)              | 22 (20–26)               | 22 (20–26)             | 0.80             |
| Cardiac index, l/min/m <sup>2</sup> (IQR)          | 1.8 (1.5–2.1)                       | 1.7 (1.5–2.1)           | 1.8 (1.7–2.1)            | 1.8 (1.5–2.1)          | 0.58             |

Bold values indicates statistical significance.

IQR, interquartile range; HF, heart failure; NYHA, New York Heart Association; GFR, glomerular filtration rate; EF, ejection fraction; LVEF, left ventricular EF; mPAP, mean pulmonary artery pressure; PAWP, pulmonary artery wedge pressure.

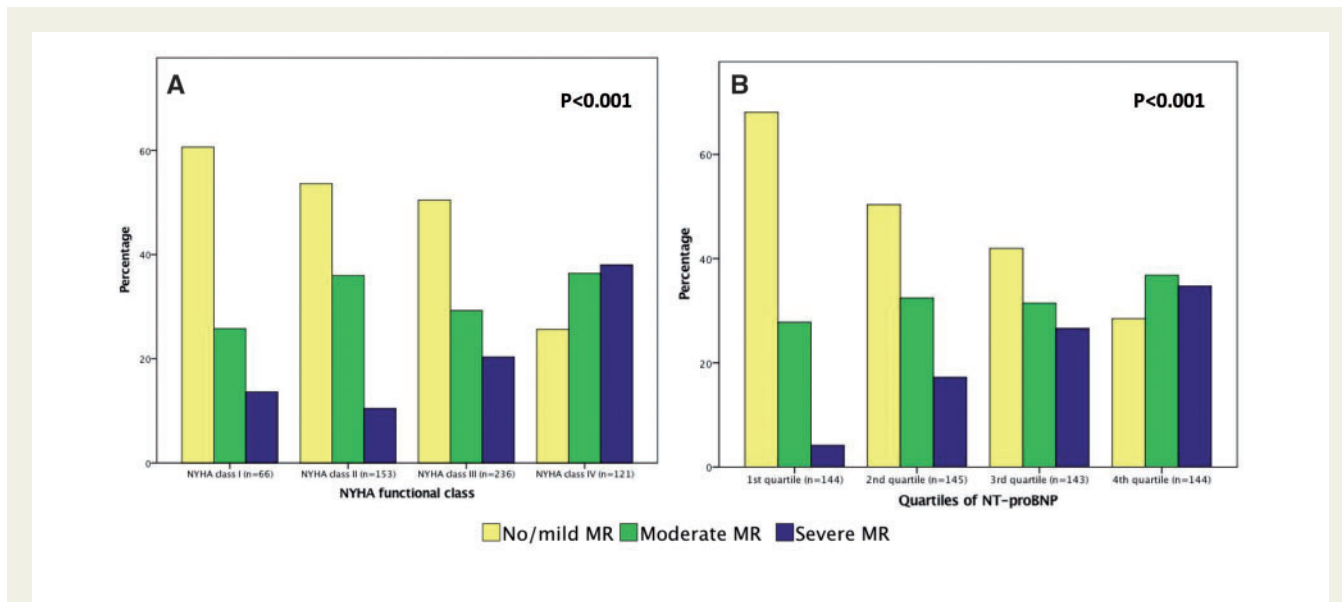

**Figure 1** Prevalence of functional mitral regurgitation according to NYHA functional class (A;  $P < 0.001$ ) and quartiles of NT-proBNP (B;  $P < 0.001$ ). NYHA, New York Heart Association; MR, mitral regurgitation.

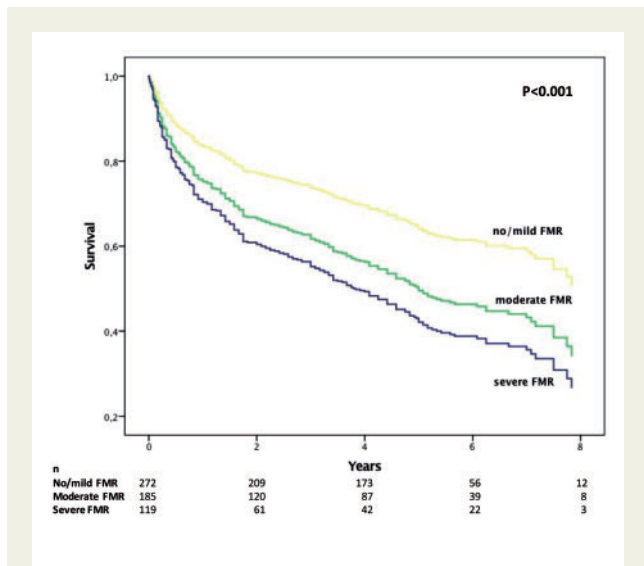

**Figure 2** Adjusted survival curves of long-term mortality according to severity of mitral regurgitation ( $P < 0.001$ ) adjusted for the clinical confounder model (i.e. age, sex, ischaemic aetiology of heart failure, serum creatinine, and NT-proBNP). FMR, functional mitral regurgitation.

within the 2nd quartile of NT-proBNP (adjusted HR 2.16, 95% CI 1.22–3.86;  $P = 0.009$ ), while no association was present in the 1st ( $P = 0.56$ ), 3rd ( $P = 0.26$ ), and 4th quartile ( $P = 0.43$ , Table 3). Additionally, severe FMR was associated with impaired survival within the 1st quartile (adjusted HR 1.49, 95% CI 1.04–2.12;  $P = 0.03$ ) and 2nd quartile (adjusted HR 1.62, 95% CI 1.05–2.48;  $P = 0.03$ ) of MR-proADM, within the 2nd quartile (adjusted HR 1.50, 95% CI 1.10–2.06;  $P = 0.01$ ) and 3rd

quartile (adjusted HR 1.34, 95% CI 1.00–1.80;  $P = 0.05$ ) of Copeptin, and within the 1st quartile (adjusted HR 1.47, 95% CI 1.06–2.02;  $P = 0.02$ ) and 2nd quartile (adjusted HR 1.89, 95% CI 1.29–2.76;  $P = 0.001$ ) of CT-pro-ET1. No association between outcome and FMR could be established for quartiles of MR-proANP. Results of the univariable and multivariable Cox regression analysis per quartile of neurohumoral marker are displayed in Supplementary material online, Table S1.

### Severe functional mitral regurgitation and haemodynamic indicators of heart failure

Invasive haemodynamic assessment was available in a total of 150 patients and results are presented in Table 1. The median mean pulmonary artery pressure was 38 mmHg (IQR 31–43) and the median wedge was 23 mmHg (IQR 20–26). Severe FMR was associated with impaired survival in patients with increased mean pulmonary artery pressure [ $\geq 42$  mmHg (3rd tertile): adjusted HR 3.10, 95% CI 1.29–7.43;  $P = 0.011$  vs. 2nd tertile:  $P = 0.69$  and 1st tertile  $P = 0.90$ ] and increased pulmonary artery wedge pressure [ $\geq 26$  mmHg (3rd tertile): adjusted HR 3.60, 95% CI 1.42–9.15;  $P = 0.007$  vs. 2nd tertile:  $P = 0.87$  and 1st tertile  $P = 0.34$ ].

### Discussion

This long-term observational study shows, for the first time, the prognostic significance of FMR in a large contemporary heart failure cohort under guideline-directed HF therapy. The main findings are (i) the adverse prognostic impact of FMR remains despite guideline directed medical therapy, (ii) the confirmation of rising FMR prevalence with increasing HF severity, (iii) the prognostic impact of severe FMR is given in a sub-cohort of a specific intermediate-failure

**Table 2** Crude and multivariable Cox regression model assessing the impact of severe of mitral regurgitation (severe functional mitral regurgitation vs. non-severe functional mitral regurgitation) on long-term mortality ( $n = 576$ /events = 271)

|                                                   | HR   | 95% CI    | P-value          | C-statistic |
|---------------------------------------------------|------|-----------|------------------|-------------|
| Crude model                                       | 1.76 | 1.34–2.30 | <b>&lt;0.001</b> | 0.55        |
| Clinical confounder cluster <sup>a</sup>          | 1.61 | 1.22–2.12 | <b>0.001</b>     | 0.64        |
| Echocardiographic confounder cluster <sup>b</sup> | 1.46 | 1.09–1.94 | <b>0.01</b>      | 0.62        |
| Optimal medical therapies cluster <sup>c</sup>    | 1.81 | 1.25–2.63 | <b>0.002</b>     | 0.61        |
| Neurohumoral activation cluster <sup>d</sup>      | 1.38 | 1.03–1.84 | <b>0.03</b>      | 0.65        |

Bold values indicates statistical significance.

HR, hazard ratio; CI, confidence interval.

<sup>a</sup>Adjusted for: age, sex, ischaemic aetiology of heart failure, serum creatinine and NT-proBNP.

<sup>b</sup>Adjusted for: LV end-diastolic diameter, LV function, severe tricuspid regurgitation.

<sup>c</sup>Adjusted for: intensified guideline-directed therapy, implanted cardioverter defibrillator, and response to cardiac resynchronization therapy.

<sup>d</sup>Adjusted for: NT-proBNP, MR-proANP, MR-proADM, CT-proET-1, and Copeptin.

**Table 3** Impact of severe mitral regurgitation on outcome compared with the remaining study population by various subgroups of heart failure defined functionally by New York Heart Association stage, biochemically by quartiles of NT-proBNP, and echocardiographically by left ventricular ejection fraction

| Subgroups                        | Patients/events | Crude HR (95% CI) | P-value      | Adjusted HR (95% CI) <sup>a</sup> | P-value      |
|----------------------------------|-----------------|-------------------|--------------|-----------------------------------|--------------|
| NYHA functional class            |                 |                   |              |                                   |              |
| NYHA I                           | 66/22           | 1.20 (0.40–3.55)  | 0.75         | 0.83 (0.27–2.49)                  | 0.73         |
| NYHA II                          | 153/58          | 1.89 (0.95–3.77)  | 0.07         | 2.17 (1.07–4.44)                  | <b>0.03</b>  |
| NYHA III                         | 236/110         | 1.81 (1.18–2.79)  | <b>0.007</b> | 1.80 (1.17–2.77)                  | <b>0.008</b> |
| NYHA IV                          | 121/81          | 1.02 (0.65–1.60)  | 0.93         | 1.09 (0.69–1.72)                  | 0.71         |
| Echocardiographic LV function    |                 |                   |              |                                   |              |
| Moderately reduced (LVEF 30–40%) | 159/76          | 2.15 (1.25–3.69)  | <b>0.006</b> | 2.37 (1.36–4.12)                  | <b>0.002</b> |
| Severely reduced (LVEF <30%)     | 325/171         | 1.29 (0.94–1.79)  | 0.12         | 1.31 (0.95–1.81)                  | 0.10         |
| Quartiles of NT-proBNP (pg/mL)   |                 |                   |              |                                   |              |
| 1st quartile (<863 pg/mL)        | 144/39          | 0.43 (0.06–3.17)  | 0.41         | 0.56 (0.07–4.05)                  | 0.56         |
| 2nd quartile (871–2360 pg/mL)    | 145/64          | 2.07 (1.19–3.62)  | <b>0.01</b>  | 2.16 (1.22–3.86)                  | <b>0.009</b> |
| 3rd quartile (2368–5159 pg/mL)   | 143/67          | 1.33 (0.78–2.26)  | 0.30         | 1.36 (0.79–2.32)                  | 0.26         |
| 4th quartile (>5167 pg/mL)       | 144/101         | 1.17 (0.78–1.76)  | 0.45         | 1.18 (0.78–1.77)                  | 0.43         |

Bold values indicates statistical significance.

NYHA, New York Heart Association; HR, hazard ratio; CI, confidence interval; LV, left ventricular; LVEF, LV ejection fraction.

<sup>a</sup>Adjusted for: age, sex, and ischaemic aetiology of heart failure.

phenotype—well-defined functionally, haemodynamically, biochemically, and morphologically, and (iv) once the transition to a full-grown HF phenotype has been completed, severe MR might be no longer of prognostic significance.

### Functional mitral regurgitation and optimal medical therapy

Heart failure is frequently accompanied by FMR as a consequence of LV remodelling. Optimal medical therapy remains the standard of care and has been shown to influence FMR severity,<sup>22</sup> whereas MV surgery is only recommended in concert with revascularization given evidence of viability or severely symptomatic patients despite OMT.<sup>2</sup> These recommendations are based on expert consensus and rely on the presumed independent contribution of FMR to remodelling and outcome in HFrEF. Multiple studies showed significant association of FMR with

survival,<sup>1,23–25</sup> however they did not disclose medical HF-management or up-titration to recommended dosages. Lamas *et al.*<sup>25</sup> investigated on a subgroup of the SAVE trial where patients were randomly assigned to Captopril or Placebo after myocardial infarction, indicating that by design, only roughly half of the patients received angiotensin converting enzyme inhibitors.<sup>25</sup> Moreover, no data on beta-blockers or mineralocorticoid receptor antagonists have been disclosed in this or other studies investigating the impact of FMR.<sup>1,26,27</sup> However, this is a contemporary observation regarding OMT in HF trials and fosters an ongoing discussion regarding the balance between therapeutic effectiveness and financial demands of modern treatments<sup>28</sup> compared with or on top of established therapies. The present study shows an independent and gradually increasing contribution of FMR to worse HFrEF outcome even on top of OMT, and independent of clinical, haemodynamic, echocardiographic and neurohumoral confounders.

## Functional mitral regurgitation in various stages of heart failure

Basic scientific studies investigating the effect of early and late repair of MR suggest a window of opportunity where early repair can reverse the otherwise progressive remodelling.<sup>5,6</sup> Formerly impossible due to the inherent invasive nature and excessive risk of perioperative mortality, percutaneous MV repair now opens new low-risk therapeutic options in HFrEF to reduce adverse effects of volume overload by FMR. Improvement with regard to symptomatic status and quality of life (QOL) has been demonstrated for the Mitraclip system in HFrEF, however a clear survival benefit could not be shown so far.<sup>26,29,30</sup> Therefore, with the advent of these new treatment options for FMR, a major challenge for the heart team is the definition of treatment-goals and subsequent allocation to the treatment of choice.

The present study for the first time defines a specific cohort of patients where severe FMR is an independent predictor of outcome despite OMT and auxiliary procedures such as PMVR could potentially reduce the burden of FMR to improve survival. Of note, whereas for instance ACCESS-EU showed a benefit for functional outcome and QOL for the MitraClip system,<sup>26</sup> only 21.9% of FMR patients included had an EF of 30–40% which, from the present analysis, seems to be the window of opportunity to reduce the impact of FMR on survival. However, as LVEF alone is only a modest marker of HF severity, we investigated further surrogates of disease severity to cover the full spectrum of HF. Our data draw a homogenous picture of the particular stage of disease where FMR is predictive and probably intervention might foil its risk. Biochemical markers, NT-proBNP, as the neurohumoral gold standard in HF, but also MR-proADM, CT-pro-ET1 and Copeptin consolidate the evidence that an intermediate-failure phenotype should be targeted for intervention. This is further supported as echocardiographic data show that in those patients with smaller LV/LA size, FMR has more impact on survival. Furthermore, as symptoms are currently the driving force for MV intervention, NYHA functional class is an important issue. Our data show an impact of FMR on survival already in patients with mild symptoms (i.e. NYHA II), with a predominant effect in NYHA class III, and it appears further that the prognostic window is closing in NYHA class IV. Taken together, the impression arises that in terms of prognosis intervention in FMR appears most effective in an intermediate-HFrEF phenotype.

## Functional mitral regurgitation and haemodynamic considerations

Based on our data, severe FMR is only associated with mortality in patients with a significantly increased pulmonary artery pressure or an increased pulmonary artery wedge pressure reflecting a sub-cohort, where FMR arises in union with severe haemodynamic impairment. Therefore, haemodynamic surrogates appear to more directly reflect the progressive cycle of LV volume overload. This suggests that single echocardiographic determination of the morphologic significance of MV regurgitation may not suffice for a comprehensive clinical decision-making and additional haemodynamic measurement may offer a more complete understanding regarding the prognostic significance of FMR.

## Limitations

The study reflects the experience of a single tertiary care-centre. However, this ensures the inclusion of a homogenous patient population, a consistent quality of imaging procedures and right heart catheterization as well as adherence to a consistent clinical routine. Data on HF hospitalizations preceding the year of study enrolment—an important additional marker of disease severity in patients with HF—were not available. Moreover, we can exclude that any patient underwent interventional MV repair during study enrolment or follow-up. However, data regarding surgical MV interventions at other centres and myocardial revascularization were not accessible. Further, it has to be mentioned that our data are only hypothesis generating in regard to intervene severe FMR and in the end these conclusions have to be confirmed by large randomized trials. Nevertheless, to the best of our knowledge, these data contain the most comprehensive information on FMR and prognosis at present.

## Conclusions

This long-term observational study for the first time demonstrates the impact of FMR in patients with guideline adherent treatment and fully disclosed medical HF management including percentage of up-titration to recommended dosage regimens. The presented results confirm the rising prevalence of FMR with increasing HF severity and foster the notion that the adverse prognostic impact of FMR is given predominantly in a sub-cohort of a specific intermediate-failure phenotype—well-defined functionally, haemodynamically, biochemically, and morphologically.

## Supplementary material

Supplementary material is available at *European Heart Journal* online.

**Conflict of interest:** none declared.

## References

- Rossi A, Dini FL, Faggiano P, Agricola E, Ciccoira M, Frattini S, Simioniciu A, Gullace M, Ghio S, Enriquez-Sarano M, Temporelli PL. Independent prognostic value of functional mitral regurgitation in patients with heart failure. A quantitative analysis of 1256 patients with ischaemic and non-ischaemic dilated cardiomyopathy. *Heart* 2011;**97**:1675–1680.
- Joint Task Force on the Management of Valvular Heart Disease of the European Society of Cardiology (ESC); European Association for Cardio-Thoracic Surgery (EACTS), Vahanian A, Alfieri O, Andreotti F, Antunes MJ, Baron-Esquivias G, Baumgartner H, Borger MA, Carrel TP, Bonis M. D, Evangelista A, Falk V, Jung B, Lancellotti P, Pierard L, Price S, Schafers HJ, Schuler G, Stepinska J, Swedberg K, Takkenberg J, Von Oppell UO, Windecker S, Zamorano JL, Zembala M. Guidelines on the management of valvular heart disease (version 2012). *Eur Heart J* 2012;**33**:2451–2496.
- Ponikowski P, Voors AA, Anker SD, Bueno H, Cleland JG, Coats AJ, Falk V, Gonzalez-Juanatey JR, Harjola VP, Jankowska EA, Jessup M, Linde C, Nihoyannopoulos P, Parissis JT, Pieske B, Riley JP, Rosano GM, Ruijlope LM, Ruschitzka F, Rutten FH, van der Meer P; Authors/Task Force Members. 2016 ESC Guidelines for the diagnosis and treatment of acute and chronic heart failure: The Task Force for the diagnosis and treatment of acute and chronic heart failure of the European Society of Cardiology (ESC) Developed with the special contribution of the Heart Failure Association (HFA) of the ESC. *Eur Heart J* 2016;**37**:2129–2200.
- Nishimura RA, Vahanian A, Eleid MF, Mack MJ. Mitral valve disease—current management and future challenges. *Lancet* 2016;**387**:1324–1334.
- Beaudoin J, Levine RA, Guerrero JL, Yosefy C, Sullivan S, Abedat S, Handschumacher MD, Szymanski C, Gilon D, Palmeri NO, Vlahakes GJ, Hajjar

- RJ, Beeri R. Late repair of ischemic mitral regurgitation does not prevent left ventricular remodeling: importance of timing for beneficial repair. *Circulation* 2013; **128**:S248–S252.
6. Beeri R, Yosefy C, Guerrero JL, Nesta F, Abedat S, Chaput M, del Monte F, Handschumacher MD, Stroud R, Sullivan S, Pugatsch T, Gilon D, Vlahakes GJ, Spinale FG, Hajjar RJ, Levine RA. Mitral regurgitation augments post-myocardial infarction remodeling failure of hypertrophic compensation. *J Am Coll Cardiol* 2008; **51**:476–486.
  7. Grigioni F, Enriquez-Sarano M, Zehr KJ, Bailey KR, Tajik AJ. Ischemic mitral regurgitation: long-term outcome and prognostic implications with quantitative Doppler assessment. *Circulation* 2001; **103**:1759–1764.
  8. Nickenig G, Schueler R, Dager A, Martinez Clark P, Abizaid A, Siminiak T, Buszman P, Demkow M, Ebner A, Asch FM, Hammerstingl C. Treatment of chronic functional mitral valve regurgitation with a percutaneous annuloplasty system. *J Am Coll Cardiol* 2016; **67**:2927–2936.
  9. De Bonis M, Al-Attar N, Antunes M, Borger M, Casselman F, Falk V, Folliguet T, lung B, Lancellotti P, Lentini S, Maisano F, Messika-Zeitoun D, Muneretto C, Pibarot P, Pierard L, Punjabi P, Rosenhek R, Suwalski P, Vahanian A, Wendler O, Prendergast B. Surgical and interventional management of mitral valve regurgitation: a position statement from the European Society of Cardiology Working Groups on Cardiovascular Surgery and Valvular Heart Disease. *Eur Heart J* 2016; **37**:133–139.
  10. Neuhoff S, Huelsmann M, Strunk G, Stoiser B, Struck J, Morgenthaler NG, Bergmann A, Moertl D, Berger R, Pacher R. Comparison of copeptin, B-type natriuretic peptide, and amino-terminal pro-B-type natriuretic peptide in patients with chronic heart failure: prediction of death at different stages of the disease. *J Am Coll Cardiol* 2008; **52**:266–272.
  11. Piepoli MF, Hoes AW, Agewall S, Albus C, Brotons C, Catapano AL, Cooney MT, Corra U, Cosyns B, Deaton C, Graham I, Hall MS, Hobbs FD, Locher ML, Lollgen H, Marques-Vidal P, Perk J, Prescott E, Redon J, Richter DJ, Sattar N, Smulders Y, Tiberi M, van der Worp HB, van Dis I, Verschuren WM; Authors/Task Force Members. 2016 European Guidelines on cardiovascular disease prevention in clinical practice: the Sixth Joint Task Force of the European Society of Cardiology and Other Societies on Cardiovascular Disease Prevention in Clinical Practice Developed with the special contribution of the European Association for Cardiovascular Prevention & Rehabilitation (EACPR). *Eur Heart J* 2016; **37**:2315–2381.
  12. Wiesbauer F, Baytaroglu C, Azar D, Blessberger H, Goliash G, Graf S, Mundigler G, Pacher R, Maurer G, Binder T. Echo Doppler parameters predict response to cardiac resynchronization therapy. *Eur J Clin Invest* 2009; **39**:1–10.
  13. Kazemi-Shirazi L, Endler G, Winkler S, Schickbauer T, Wagner O, Marsik C. Gamma glutamyltransferase and long-term survival: is it just the liver? *Clin Chem* 2007; **53**:940–946.
  14. Lang RM, Bierig M, Devereux RB, Flachskampf FA, Foster E, Pellikka PA, Picard MH, Roman MJ, Seward J, Shanewise J, Solomon S, Spencer KT, St John Sutton M, Stewart W; American Society of Echocardiography's Nomenclature and Standards Committee; Task Force on Chamber Quantification; American College of Cardiology Echocardiography Committee; American Heart Association; European Association of Echocardiography, European Society of Cardiology. Recommendations for chamber quantification. *Eur J Echocardiogr* 2006; **7**:79–108.
  15. Baumgartner HC, Hung JC-C, Bermejo J, Chambers JB, Edvardsen T, Goldstein S, Lancellotti P, LeFevre M, Miller F Jr, Otto CM. Recommendations on the echocardiographic assessment of aortic valve stenosis: a focused update from the European Association of Cardiovascular Imaging and the American Society of Echocardiography. *Eur Heart J Cardiovasc Imaging* 2017; **18**:254–275.
  16. Lancellotti P, Tribouilloy C, Hagendorff A, Popescu BA, Edvardsen T, Pierard LA, Badano L, Zamorano JL; Scientific Document Committee of the European Association of Cardiovascular Imaging. Recommendations for the echocardiographic assessment of native valvular regurgitation: an executive summary from the European Association of Cardiovascular Imaging. *Eur Heart J Cardiovasc Imaging* 2013; **14**:611–644.
  17. Adlbrecht C, Hulsman M, Strunk G, Berger R, Mortl D, Struck J, Morgenthaler NG, Bergmann A, Jakowitsch J, Maurer G, Lang IM, Pacher R. Prognostic value of plasma midregional pro-adrenomedullin and C-terminal-pro-endothelin-1 in chronic heart failure outpatients. *Eur J Heart Fail* 2009; **11**:361–366.
  18. Klaar U, Gabriel H, Bergler-Klein J, Pernicka E, Heger M, Mascherbauer J, Rosenhek R, Binder T, Maurer G, Baumgartner H. Prognostic value of serial B-type natriuretic peptide measurement in asymptomatic organic mitral regurgitation. *Eur J Heart Fail* 2011; **13**:163–169.
  19. Daniels LB, Clopton P, Potocki M, Mueller C, McCord J, Richards M, Hartmann O, Anand IS, Wu AH, Nowak R, Peacock WF, Ponikowski P, Mockel M, Hogan C, Filippatos GS, Di Somma S, Ng L, Neath SX, Christenson R, Morgenthaler NG, Anker SD, Maisel AS. Influence of age, race, sex, and body mass index on interpretation of midregional pro atrial natriuretic peptide for the diagnosis of acute heart failure: results from the BACH multinational study. *Eur J Heart Fail* 2012; **14**:22–31.
  20. Shah RV, Truong QA, Gaggin HK, Pfannkuche J, Hartmann O, Januzzi JL Jr. Mid-regional pro-atrial natriuretic peptide and pro-adrenomedullin testing for the diagnostic and prognostic evaluation of patients with acute dyspnoea. *Eur Heart J* 2012; **33**:2197–2205.
  21. Mayyas F, Niebauer M, Zurick A, Barnard J, Gillinov AM, Chung MK, Van Wagoner DR. Association of left atrial endothelin-1 with atrial rhythm, size, and fibrosis in patients with structural heart disease. *Circ Arrhythm Electrophysiol* 2010; **3**:369–379.
  22. Weiner RB, Baggish AL, Chen-Tournoux A, Marshall JE, Gaggin HK, Bhardwaj A, Mohammed AA, Rehman SU, Barajas L, Barajas J, Gregory SA, Moore SA, Semigran MJ, Januzzi JL Jr. Improvement in structural and functional echocardiographic parameters during chronic heart failure therapy guided by natriuretic peptides: mechanistic insights from the ProBNP Outpatient Tailored Chronic Heart Failure (PROTECT) study. *Eur J Heart Fail* 2013; **15**:342–351.
  23. Ellis SG, Whitlow PL, Raymond RE, Schneider JP. Impact of mitral regurgitation on long-term survival after percutaneous coronary intervention. *Am J Cardiol* 2002; **89**:315–318.
  24. Grigioni F, Detaint D, Avierinos JF, Scott C, Tajik J, Enriquez-Sarano M. Contribution of ischemic mitral regurgitation to congestive heart failure after myocardial infarction. *J Am Coll Cardiol* 2005; **45**:260–267.
  25. Lamas GA, Mitchell GF, Flaker GC, Smith SC Jr, Gersh BJ, Basta L, Moye L, Braunwald E, Pfeffer MA; Survival and Ventricular Enlargement Investigators. Clinical significance of mitral regurgitation after acute myocardial infarction. *Circulation* 1997; **96**:827–833.
  26. Maisano F, Franzen O, Baldus S, Schafer U, Hausleiter J, Butter C, Ussia GP, Sievert H, Richardt G, Widder JD, Moccetti T, Schillinger W. Percutaneous mitral valve interventions in the real world: early and 1-year results from the ACCESS-EU, a prospective, multicenter, nonrandomized post-approval study of the MitraClip therapy in Europe. *J Am Coll Cardiol* 2013; **62**:1052–1061.
  27. Puls M, Lubos E, Boekstegers P, von Bardeleben RS, Ouarrak T, Butter C, Zuern CS, Bekeredjian R, Sievert H, Nickenig G, Eggebrecht H, Senges J, Schillinger W. One-year outcomes and predictors of mortality after MitraClip therapy in contemporary clinical practice: results from the German transcatheter mitral valve interventions registry. *Eur Heart J* 2016; **37**:703–712.
  28. Packer M. Heart failure's dark secret: does anyone really care about optimal medical therapy? *Circulation* 2016; **134**:629–631.
  29. Feldman T, Foster E, Glower DD, Kar S, Rinaldi MJ, Fail PS, Smalling RW, Siegel R, Rose GA, Engeron E, Loghin C, Trento A, Skipper ER, Fudge T, Letsou GV, Massaro JM, Mauri L, Investigators EI. Percutaneous repair or surgery for mitral regurgitation. *N Engl J Med* 2011; **364**:1395–1406.
  30. Feldman T, Kar S, Elmariah S, Smart SC, Trento A, Siegel RJ, Apruzzese P, Fail P, Rinaldi MJ, Smalling RW, Hermlinger JB, Heimansohn D, Gray WA, Grayburn PA, Mack MJ, Lim DS, Ailawadi G, Herrmann HC, Acker MA, Silvestry FE, Foster E, Wang A, Glower DD, Mauri L, Investigators EI. Randomized comparison of percutaneous repair and surgery for mitral regurgitation: 5-year results of EVEREST II. *J Am Coll Cardiol* 2015; **66**:2844–2854.
